1 **Factors contributing to immunization coverage among children less than 5 years in Nadowli-**  
2 **Kaleo District of Upper West Region, Ghana**

3 Alice Kuuyi<sup>1,2</sup>, Robert Kogi<sup>2,3</sup>

4 <sup>1</sup>Nadowli-Kaleo District Health Directorate, Nadowli, Ghana Health Service; <sup>2</sup>Asunafo South  
5 District Health Directorate, Kukuom, Ghana Health Service; <sup>3</sup>Department of Social and  
6 Behavioural Sciences, School of Public Health, University of Ghana, Legon, Accra, Ghana

## 7           **Abstract**

8           Immunization is believed to prevent deaths from diseases such as diphtheria, tetanus,  
9           whooping cough and measles in about 2.5 million children each year worldwide. Failure to  
10          vaccinate children in the required timeframe could result in disease outbreaks and increased costs.  
11          This study was to identify the causes of low vaccination coverage among children in Nadowli-  
12          Kaleo district, Ghana.

13          An analytical cross-sectional study was adopted for this study. Three hundred and thirty-  
14          six participants (336) were recruited through a systematic sampling method. Data was collected  
15          using KoboCollect online data collection tool. Data was analyzed using Stata Version 17.0. Chi-  
16          square test was used to establish a link between the child's immunization status and the independent  
17          variables. Finally, logistic regression was used to determine the degree of association. To  
18          determine statistical significance, a p-value of less than 0.05 at the 95 percent confidence level was  
19          employed.

20          It was revealed that immunization status among children under-five was a little above  
21          average (55.4%). Factors that were significantly associated with child full immunization were  
22          mother's or caregiver's age, marital status, occupation, and current child's birth order (p-value <  
23          0.05). Other location-related factors significantly associated with full immunization of children  
24          were number of ANC visits, delivery location, and distance to health facility. Giving birth to a  
25          child at the health facility had higher chance of 2.12 times to be fully immunized than giving birth  
26          at home [AOR (95%CI) p-value=2.12 (1.14-3.94)0.017]. The health system related factors which  
27          were found to be statistically associated with child full immunization included time spent during  
28          immunization service and being informed when to come for the next vaccination.

29            Immunization coverage is not very encouraging at our study site. To enhance childhood  
30 vaccination rates, we suggest expanding access to health services, institutional childbirth, and  
31 timely regular antenatal visits.

## 32 Introduction

33 Immunization is a measure used in a person to make him or her resistant against an  
34 infectious disease by typically administering a vaccine or previous infection to the wild  
35 microorganism [1]. Vaccine is given to protect the person's body system against any future  
36 infection or disease [2]. Immunization coverage, on the other hand, is referred to the percentage of  
37 individuals in a target population who are vaccinated [3]. Over the years, immunization has been  
38 proven to be a very cost-effective and life-saving intervention which protects people from needless  
39 suffering like sickness, disability, and death. Most importantly, the benefits of immunization are  
40 to all people, which target the improvement in health and life expectancy, with impact at the social,  
41 economic global, national, and community levels [4]. There is a great contribution to be made by  
42 the increasingly interdependent communities working together to tackle diseases, which are of  
43 public health concern and can be prevented with vaccine [5].

44 Basic immunizations are estimated to avert 2.5 million annual child deaths globally from  
45 diphtheria, tetanus, Pertussis and measles [6]. Currently, more children are getting vaccinated at  
46 the appropriate time, but approximately 20 million individuals across the globe are still not  
47 receiving vaccinations, leaving them vulnerable to severe illnesses, fatalities, handicaps, and poor  
48 health. African regions alone accounted for 8.5% of unvaccinated children in the world and almost  
49 much as in other regions combined [7]. Globally, Africa has the lowest coverage of children fully  
50 vaccinated [8]. A weakness of this system is the high dropout rate between doses. Therefore, there  
51 is a need to strengthen health care and routine immunization systems throughout the region [9].

52 It was established in Ghana in 2014 that, nationwide, the proportion of children aged 12-  
53 23 months who did not receive all basic immunizations decreased from 79% to 77% [9]. During

54 the same period, the proportion of children without childhood vaccination increased nationally  
55 from 1% to 2% [9].

56 The need to raise child survival is a key global development goal, which is emphasized  
57 once again in the Sustainable Development Goals (2016–2030). Massive investments have been  
58 made as a result of these agreements to enhance the acceptability, affordability, and accessibility  
59 of child health intervention programs, particularly those related to nutrition and immunization  
60 services [10]. The Ghana Health Service (GHS) has enhanced its Expanded Programme on  
61 Immunization (EPI) to align with the global objectives established at the 1988 World Health  
62 Assembly. In addition to vaccination coverage, the GHS now emphasizes eradicating other  
63 illnesses like poliomyelitis, while also striving to eliminate measles and neonatal tetanus. Disease  
64 surveillance and control measures have also been intensified [11]. Immunization performance has  
65 become a key health performance indicator in Ghana for the entire health sector and is monitored  
66 at all levels [11]. However, reports show that some districts record low immunization, stifling the  
67 achievement of set targets.

68 Studies have indicated that factors that affect immunization coverage could be client-  
69 related, service-related, or health management-related. For instance, it was reported that lack of  
70 information or motivation, place of immunization not convenient for mothers, inconvenient  
71 immunization time, vaccinators absent, family problems, including maternal overwork, maternal  
72 illness and child illness, were identified as factors which influenced immunization coverage [12].  
73 The level of compliance of mothers with childhood immunization is also influenced by their  
74 knowledge of childhood immunization, higher level of maternal education, birth within close  
75 proximity to a medical facility and in a medical facility [13].

76           The national target for all antigens in Ghana is 95% coverage [14]. Penta 3 has been used  
77 as a reference indicator for measuring the coverage, quality, and utilization of childhood  
78 immunization. For the past 10 years, Ghana is able to maintain high immunization coverage rates  
79 between roughly 90-95%. However, there are reports of low-performing areas in some districts  
80 which are not achieving the 95% target with 3 doses of pentavalent vaccine [15]. This has been  
81 demonstrated in the Nadowli-Kaleo district where the immunization coverage has been  
82 consistently below the national target of 95% coverage for all antigens over the five years. The  
83 Penta 3 coverage for Nadowli-Kaleo District from 2015 to 2019 was 71.9%, 71.3%, 70%, 70%  
84 and 72.7% respectively [16]. This poses a threat to vaccine-preventable disease outbreaks and  
85 other implications of low coverage, hence, making this study necessary.

86           Enhancing the extent of immunization is crucial in advancing the health of children and  
87 diminishing the incidence of ailments and fatalities during childhood. However, immunization  
88 coverage in developing countries has been reported to be low [6]. For instance, in Ethiopia, a study  
89 conducted using a cross-sectional study design revealed that 77.4% of children received full  
90 immunization, 15.5% children were partially immunized, while some 7.1% did not receive any  
91 antigen (6). In Mukurweni and Tetu Sub-counties, Kenya, moderate and high immunization  
92 coverages were reported in Mukurweini and Tetu Divisions respectively [17].

93           Moreover, it has been found that substantial socioeconomic inequities, such as residency,  
94 wealth, educational status, and the number of children in a household, affect the coverage of  
95 immunization [18]. For instance, in Kenya, a population-based cross-sectional study conducted  
96 identified that the factors which influenced low immunization coverage included; family size,  
97 location of child's birth, the level of literacy, awareness of the vaccination schedule, and whether  
98 or not the family lives a nomadic lifestyle [5]. Moreover, Kiptoo and colleagues noted that the

99 income of the household, the proximity of the nearest healthcare facility, and whether the family  
100 resided in an urban or rural area impacted immunization coverage [5].

101 In addition, another study conducted in the slums of Mumbai, India, using a community-  
102 based cross-sectional approach found that inadequate time, insufficient knowledge, concerns about  
103 negative side effects, and potential income loss were among the significant factors that hindered  
104 people from receiving immunizations [19]. Moreover, a study conducted in Burkina Faso revealed  
105 that factors such as location of residence, year of visit, ethnic group, and maternal education were  
106 strongly linked to the vaccination status of individuals [20]. Additionally, factors related to the  
107 mother such as her occupation, educational background, age, and familiarity with vaccine-  
108 preventable illnesses and vaccination, were identified as influencers of immunization coverage in  
109 the Assin North Municipality, located in the Central Region of Ghana [21]. Also, it was revealed  
110 in another study conducted in the Tamale Metropolis that attaining a higher education, being a  
111 mother, having an older age, earning a higher income, having a greater number of children, living  
112 in rural areas, possessing extensive knowledge on immunization, and exhibiting a positive attitude  
113 towards immunization, all resulted in a decline in the failure to comply with all the planned  
114 immunizations [22].

115 It was further reported in India that caregivers perceived several barriers to immunization.  
116 These barriers included a shortage of time, concerns about potential adverse effects from the  
117 vaccination, and poor staff conduct [19]. In Ethiopia, it was also noted that the distance from health  
118 facility, delivery place, and follow-up during ANC, were significance with a child being fully  
119 immunized [23]. Similarly, it was revealed in a qualitative study conducted in Ethiopia that the  
120 most commonly shared factors among the discussants which affected routine childhood  
121 immunization service uptake were inaccessible health facilities, unfavourable attitudes, poor

122 performance and mistreatment of healthcare personnel, inconvenient vaccination schedules,  
123 insufficient information during vaccination days, and extended waiting periods [23].

## 124 **Methods**

### 125 **Study Design**

126 This study adopted a cross-sectional study involving 336 mothers whose children were  
127 under five years of age and living in the Nadowli-Kaleo District. This design was chosen as the  
128 researchers intended to gain knowledge and information on low immunization coverage within a  
129 short period in the study area.

### 130 **Study Site Description**

131 The Nadowli-Kaleo District is positioned in the central region of Ghana's Upper West area,  
132 with latitude between 10' 20' and 11' 30' north and longitude 3'10' and 2'10' west. It shares borders  
133 to the south with the Wa Municipal, to the west with Burkina Faso, north with Jirapa District, and  
134 to the east with the Daffiama-Bussie-Issa District. The district spans an area of 2,742.50 km<sup>2</sup>,  
135 stretching from the Billi Bridge to the Dapuori Bridge, nearly 12 km away from Jirapa. The district  
136 extends from the Black Volta (Charikpong) to Daffiama from west to east. According to the 2010  
137 Population and Housing Census, the district had a population of 61,561, which accounted for 8.8%  
138 of the Upper West Region's total population (24). The majority (53.35%) of the population of the  
139 district is the female group with a Total Fertility Rate (TFR) of 3.2 [24]. On the other hand, the  
140 General Fertility Rate (GFR) stood at 85.8 births per 1000 women in fertility age (15-49 years),  
141 which is the fourth lowest among the districts in the region [24]. Finally, the Nadowli-Kaleo  
142 district has one district hospital serving as a referral centre situated in Nadowli, 10 health centres,  
143 and 145 outreach points which offer immunization services.



## 144 **Study Population**

145 All mothers or caregivers with children below the age of five and living within the  
146 Nadowli-Kaleo District were part of the study's participants.

## 147 **Inclusion and Exclusion criteria**

148 The mothers or caregivers who were included in this study were those with children up to  
149 five years of age, who were residents of the district. Mothers whose children fit the inclusion  
150 criteria but were severely sick and needed medical attention were excluded.

## 151 **Sample Size Determination**

152 We calculated the sample size for this study by using the Cochran formula (25),  $n = \frac{Z^2 pq}{d^2}$ ,  
153 Where  $n$  = Sample size,  $Z = Z_{\text{score}}$ ,  $p$  = proportion estimated for immunization coverage present in  
154 the population. Coverage of 72.7% obtained in the year 2019 for Penta 3 [14] in the Nadowli-  
155 Kaleo District is used.  $q = 1 - p$ ,  $d$  = Level of statistical significance of 95% = (0.05). The used the  
156 assumption of a margin of error of 0.05 and a 95% confidence level.

157 A sample size  $(n) = \frac{(1.96)^2 \times 0.727 \times (1 - 0.727)}{(0.05)^2} = n \approx 305$

158 Adding a non-respond rate of 10%,  $n = (305 \times 0.10) + 305 = 336$ . Therefore, 336 mothers  
159 with children less than five years were considered in the study.

## 160 **Sampling method**

161 All eight subdistricts in the Nadowli-Kaleo District were considered in conducting this  
162 study. This study was conducted in health centres because they recorded a high intake of CWC  
163 attendance in the district. The data was collected in all 8 subdistricts in the district, and all 9 health  
164 centres where CWC was conducted were purposively used.

165 The proportionate sample size at each CWC centre was obtained using the 2019  
 166 immunization coverage for Penta 3 per subdistrict as shown in Table 1. These proportional samples  
 167 were calculated and estimated in the table below.

168 **Table 1: Proportional allocation of study population by Sub-district**

| Sub-district | Immunization Coverage | Sub-district sample size = $\frac{\text{Sub - district coverage}}{\text{Dsitric coverage}} \times \text{study sample size}$ |
|--------------|-----------------------|-----------------------------------------------------------------------------------------------------------------------------|
| Charikpong   | 210                   | $\frac{210}{2166} \times 336 = 33$                                                                                          |
| Dapour       | 186                   | $\frac{186}{2166} \times 336 = 29$                                                                                          |
| Jang         | 406                   | $\frac{406}{2166} \times 336 = 63$                                                                                          |
| Kaleo        | 415                   | $\frac{415}{2166} \times 336 = 64$                                                                                          |
| Nadowli      | 409                   | $\frac{409}{2166} \times 336 = 63$                                                                                          |
| Nanvil       | 120                   | $\frac{120}{2166} \times 336 = 19$                                                                                          |
| Sombo        | 187                   | $\frac{187}{2166} \times 336 = 29$                                                                                          |
| Takpo        | 233                   | $\frac{233}{2166} \times 336 = 36$                                                                                          |
| <b>Total</b> | <b>2166</b>           | <b>336</b>                                                                                                                  |

169 To obtain the appropriate sample size for this study, a systematic sampling technique was  
 170 used. Systematic sampling is a type of random sampling where the initial unit is chosen randomly  
 171 using random numbers, and subsequent units are chosen automatically based on a predetermined  
 172 pattern (26). Initially, the researchers collaborated with the heads of different healthcare facilities  
 173 to determine the count of children registered in the Child Welfare Clinic (CWC) registers who fell  
 174 within the age range of 0 to 59 months. The register was numbered serially to form the sampling  
 175 frame, then the proportionate sample to be obtained was used to divide it. Secondly, the total  
 176 number of children in each register was divided by the respective samples for each of the  
 177 subdistricts to calculate the interval that was used when selecting the children. Numbers on the  
 178 ballot papers were given from 1 to the interval number that was obtained. That number

179 corresponded to the mother who had that number that comes with the facility. That sampling  
180 interval number was then be added to obtain every nth number.

## 181 **Data collection procedure**

182 Four people were trained to collect the data. The training was done using both English and  
183 Dagaare; demonstration was done using Dagaare which aided in effective data collection. The  
184 essence of the research and procedure were explained to them. They were encouraged to ask  
185 questions to clarify any doubts.

186 Interviewer-administered pretested questionnaire was administered to respondents using  
187 Kobo Collect online data collection tool. The questionnaire was made up of five sections: socio-  
188 demographic characteristics of respondents, knowledge-based questions of caregivers/mothers on  
189 child immunization, and attitude of caregivers/mothers towards child immunization. To obtain  
190 health system related factors, mothers were asked such questions as long waiting period, attitude  
191 of health workers towards them, special education to them on immunization when they came,  
192 information on side effects, how to take care of it, as well as distance to the nearest facility. Data  
193 was collected on the days' caregivers/mothers attended the child welfare clinic. The methods  
194 employed to distribute the questionnaires involved individualized interaction, where the questions  
195 were asked directly and answered by the respondents. On average, it took approximately 15  
196 minutes for each respondent to complete the questionnaire.

## 197 **Data analysis**

198 The data produced was processed and imported into the STATA 17.0 software for analysis.  
199 The main focus of the study was to determine the immunization status of children under the age  
200 of 5, which was classified as either fully immunized or partially immunized. In addition, the  
201 researchers analyzed independent variables, including factors related to the mother's individual

202 and community characteristics such as age, education, occupation, antenatal care visits, and the  
203 birth order of the child. Categorical variables were presented as proportions and frequencies. The  
204 dependent/outcome variable was a dichotomous variable (Fully or partially immunized).  
205 Immunization was defined as follows: 1 is full immunization if the child received both doses of  
206 the vaccine as recommended and partially as 0 if a child did not receive any dose or received one  
207 dose of vaccine before the study. The association between immunization status and independent  
208 variables was analyzed using the chi-square test. Additionally, logistic regression was employed  
209 to assess the predictors of the immunization. To determine significant associations, a confidence  
210 interval of 95% and a p-value below 0.05 were used as criteria.

## 211 **Ethical Issues**

212 Ethical clearance was sought from University of Health and Allied Sciences (UHAS)  
213 Ethics Review Committee for approval (**UHAS-REC A.9 [126] 20-21**). Permission was sought  
214 from the Upper West Regional Directorate and the District Health Directorate of the Nadowli-  
215 Kaleo District. Formal verbal consent was obtained from all the participants involved in the study.  
216 The recruited participants were given complete information regarding the research's aim, and their  
217 privacy as well as confidentiality were guaranteed. The researchers sought the consent from all the  
218 participants. It is worth noting that no mother or caretaker was compensated for their involvement  
219 in the study. However, they were assured that the findings from this study would be used to  
220 improve the overall immunization coverage in the district.

221 Any interaction during data collection was done while wearing a facemask and maintaining  
222 social distancing as ways of observing the Covid-19 protocol. Research assistants and participants  
223 were also used alcohol-based hand sanitizers throughout the period of the data collection.

## 224 **Results, Discussion, Conclusions**

### 225 **Results**

226 The results in Table 2 showed that the majority, 144 (42.9%) of the respondents (mothers)  
227 were 30 years old and below. This was immediately followed by those aged 31-35 years, 141  
228 (42.0%). A greater proportion, 193 (57.4%) of the children in this study were within 24-59 months  
229 old and most, 173 (51.5%) were females. Majority 147 (43.8%) of the children in this study were  
230 first born.

231 Among the mothers, a majority 247 (73.5%) of them were married and a greater number  
232 216 (64.3%) of the mothers were Christians. Moreover, most 223 (66.4%) of the respondents were  
233 Dagaabas. Majority 172 (51.2%) of the respondents attained primary or JHS education. The results  
234 further showed that majority 177 (52.7%) of the respondents were unemployed and most 315  
235 (93.8%) of them were rural dwellers. In addition, majority 148 (44.1%) of the respondents earned  
236 from Gh¢100.00- <Gh¢500.00. Moreover, the majority 181 (53.9%) of the mothers in this study  
237 were found to make four ANC visits. Finally, a vast majority 270 (80.4%) of the mothers delivered  
238 in a health facility.

239 **Table 2: Socio-demographic characteristics of mothers/caregivers**

| <b>Age of mother/caregiver</b> | <b>Frequency (N=336)</b> | <b>Percentage (%)</b> |
|--------------------------------|--------------------------|-----------------------|
| <=30                           | 144                      | 42.9                  |
| 31-35                          | 141                      | 42.0                  |
| 36-40                          | 42                       | 12.5                  |
| 41 and above                   | 9                        | 2.7                   |
| <b>Age of child (Months)</b>   |                          |                       |
| 0-11 months                    | 13                       | 3.9                   |
| 12-23 months                   | 130                      | 38.7                  |
| 24-59 months                   | 193                      | 57.4                  |
| <b>Sex of child</b>            |                          |                       |
| Female                         | 173                      | 51.5                  |

|                             |     |      |
|-----------------------------|-----|------|
| Male                        | 163 | 48.5 |
| <b>Birth order of child</b> |     |      |
| 1st                         | 147 | 43.8 |
| 2nd                         | 89  | 26.4 |
| ≥3rd                        | 100 | 29.8 |
| <b>Marital status</b>       |     |      |
| Married                     | 247 | 73.5 |
| Single                      | 89  | 26.5 |
| <b>Religion</b>             |     |      |
| Christian                   | 216 | 64.3 |
| Muslim                      | 120 | 35.7 |
| <b>Ethnicity</b>            |     |      |
| Akan                        | 15  | 4.5  |
| Dagaa                       | 223 | 66.4 |
| Sissala                     | 26  | 7.7  |
| Waale                       | 72  | 21.4 |
| <b>Level of Educational</b> |     |      |
| None                        | 65  | 19.4 |
| Primary/JHS                 | 172 | 51.2 |
| SHS                         | 43  | 12.8 |
| Tertiary                    | 56  | 16.7 |
| <b>Occupation</b>           |     |      |
| Government employee         | 59  | 17.6 |
| Self employed               | 100 | 29.8 |
| Unemployed                  | 177 | 52.7 |
| <b>Residential status</b>   |     |      |
| Rural                       | 315 | 93.8 |
| Urban                       | 21  | 6.3  |
| <b>Monthly income</b>       |     |      |
| <100                        | 122 | 36.3 |
| 100- <500                   | 148 | 44.1 |
| 500-1000                    | 31  | 9.2  |
| >1000                       | 35  | 10.4 |
| <b>Number of ANC visits</b> |     |      |
| No ANC visit                | 18  | 5.3  |
| <4 times                    | 181 | 53.9 |
| ≥4 times                    | 137 | 40.8 |
| <b>Place of delivery</b>    |     |      |
| Home                        | 66  | 19.6 |
| Health facility             | 270 | 80.4 |

240 Majority (55.4%) of the respondents (children) in this study were found to be fully  
 241 immunized as indicated in Fig 1.

242

243 **Fig 1: Immunization status of children**

244 It is found in Table 3 that the majority 85 (45.7%) of the respondents who were fully  
 245 immunized were within 31-35 years and most 149 (80.1%) of the women who were married had  
 246 their children fully immunized. Moreover, most 116 (62.4%) Christians had their children fully  
 247 immunized. A greater proportion 122 (65.6%) of the respondents who belonged to the Dagaaba  
 248 ethnic group had their children fully immunized. A higher proportion 178 (95.7%) of the  
 249 respondents who were rural dwellers had their children fully immunized.

250 Moreover, the majority 90 (48.4%) of the respondents who attained either primary or JHS  
 251 education had their children fully immunized. Majority 95 (51.1%) of the unemployed were found  
 252 to have their children fully immunized and most 165 (88.7%) of the respondents who earned less  
 253 than GHC500.00 a month had their children fully immunized. Moreover, most 180 (94.7%) of the  
 254 children who were above 12 months of age were fully immunized. Additionally, the majority 98  
 255 (51.6%) of the children who were females were fully immunized, while most 73 (39.3%) of the  
 256 first-born children were fully immunized.

257 Furthermore, it was found in this study that the factors which were significantly associated  
 258 with child’s full immunization were mother’s or caregiver’s age, marital status, occupation, and  
 259 birth order of the current child [ $X^2(P\text{-value} = 8.57(0.014), 9.31(0.002), 7.82(0.020), \text{ and}$   
 260  $7.90(0.019)$  respectively].

261 **Table 3: Association between respondents’ socio-demographic characteristics and child full**  
 262 **immunization**

| Variables                     | Immunization status            |                            | Pearson Chi-square | p-value |
|-------------------------------|--------------------------------|----------------------------|--------------------|---------|
|                               | Partially immunized<br>(n=146) | Fully immunized<br>(n=190) |                    |         |
| <b>Age (Mother/caregiver)</b> |                                |                            |                    |         |
| ≤30                           | 77 (51.3)                      | 67 (36.0)                  | 8.57               | 0.014   |
| 31-35                         | 56 (37.3)                      | 85 (45.7)                  |                    |         |
| 36 and above                  | 17 (11.3)                      | 34 (18.3)                  |                    |         |

|                                     |            |            |      |       |
|-------------------------------------|------------|------------|------|-------|
| <b>Marital status</b>               |            |            |      |       |
| Married                             | 98 (65.3)  | 149 (80.1) |      |       |
| Single                              | 52 (34.7)  | 37 (19.9)  | 9.31 | 0.002 |
| <b>Religion</b>                     |            |            |      |       |
| Christian                           | 100 (66.7) | 116 (62.4) |      |       |
| Muslim                              | 50 (33.3)  | 70 (37.6)  | 0.67 | 0.413 |
| <b>Ethnicity</b>                    |            |            |      |       |
| Dagaao                              | 101 (67.3) | 122 (65.6) |      |       |
| Sissala                             | 15 (10.0)  | 26 (14.0)  | 1.31 | 0.520 |
| Waale                               | 34 (22.7)  | 38 (20.4)  |      |       |
| <b>Level of Educational</b>         |            |            |      |       |
| None                                | 26 (17.3)  | 39 (21.0)  |      |       |
| Primary/JHS                         | 82 (54.7)  | 90 (48.4)  |      |       |
| SHS                                 | 24 (16.0)  | 19 (10.2)  | 6.92 | 0.075 |
| Tertiary                            | 18 (12.0)  | 38 (20.4)  |      |       |
| <b>Occupation</b>                   |            |            |      |       |
| Government employee                 | 17 (11.3)  | 42 (22.6)  |      |       |
| Self employed                       | 51 (34.0)  | 49 (26.3)  | 7.82 | 0.020 |
| Unemployed                          | 82 (54.7)  | 95 (51.1)  |      |       |
| <b>Residential status</b>           |            |            |      |       |
| Rural                               | 137 (91.3) | 178 (95.7) |      |       |
| Urban                               | 13 (8.7)   | 8 (4.3)    | 2.70 | 0.100 |
| <b>Monthly income</b>               |            |            |      |       |
| <500                                | 140 (93.3) | 165 (88.7) |      |       |
| ≥500                                | 10 (6.7)   | 21 (11.3)  | 2.12 | 0.145 |
| <b>Age of child (Months)</b>        |            |            |      |       |
| ≤12                                 | 11 (7.5)   | 10 (5.3)   |      |       |
| >12                                 | 135 (92.5) | 180 (94.7) | 0.73 | 0.394 |
| <b>Sex of children</b>              |            |            |      |       |
| Female                              | 75 (51.4)  | 98 (51.6)  |      |       |
| Male                                | 71 (48.6)  | 92 (48.4)  | 0.00 | 0.970 |
| <b>Birth order of current child</b> |            |            |      |       |
| 1st                                 | 74 (49.3)  | 73 (39.3)  |      |       |
| 2nd                                 | 43 (28.7)  | 46 (24.7)  | 7.90 | 0.019 |
| ≥3rd                                | 33 (22.0)  | 67 (36.0)  |      |       |

263 The results in Table 4 showed that the majority 90 (47.4%) of the respondents who made  
264 at least one ANC attendance had their children fully immunized. For respondents who delivered  
265 in the health facility, majority, 166 (87.4%) of them had their children fully immunized. Mothers  
266 who walked at most 5 kilometres to the nearest health facility had most of their children being  
267 fully immunized 169 (88.9%). Additionally, the results further depicted that number of ANC visits,



268 place of delivery, and distance to health facility were all factors which had statistically significance  
 269 association with child full immunization [ $X^2(P\text{-value}) = 10.13(0.006)$ ,  $13.62(P < 0.001)$  and  
 270  $4.38(0.036)$  respectively].

271 **Table 4: Association between children’s immunization status and community-related factors**

| Variables                          | Immunization status         |                         | Pearson Chi-square | p-value           |
|------------------------------------|-----------------------------|-------------------------|--------------------|-------------------|
|                                    | Partially immunized (n=146) | Fully immunized (n=190) |                    |                   |
| <b>Number of ANC visits</b>        |                             |                         |                    |                   |
| No ANC visit                       | 11 (7.5)                    | 10 (5.2)                | 10.13              | <b>0.006</b>      |
| ≤3 times                           | 89 (61.0)                   | 90 (47.4)               |                    |                   |
| 4+ times                           | 46 (31.5)                   | 90 (47.4)               |                    |                   |
| <b>Place of delivery</b>           |                             |                         |                    |                   |
| Home                               | 42 (28.8)                   | 24 (12.6)               | 13.62              | <b>P&lt;0.001</b> |
| Health facility                    | 104 (71.2)                  | 166 (87.4)              |                    |                   |
| <b>Distance to health facility</b> |                             |                         |                    |                   |
| >5KM                               | 28 (19.2)                   | 21 (11.1)               | 4.38               | <b>0.036</b>      |
| ≤ 5KM                              | 118 (80.8)                  | 169 (88.9)              |                    |                   |

272 The results in Table 5 showed that the majority 99 (52.1%) of the respondents who  
 273 indicated that they were never screamed at by health worker (s) when they were late during  
 274 immunization had their children fully immunized. Moreover, most 115 (60.5%) of the mothers  
 275 who spent less than 30 minutes in immunization had their children fully immunized. A greater  
 276 proportion, 146 (76.8%) of the mothers who were educated on how to manage vaccine side effects  
 277 also had their children fully immunized. Lastly, the majority 153 (80.5%) of the mothers who were  
 278 informed about their next CWC visit also had their children fully immunized.

279 In addition, the health system related factors which were found to be statistically associated  
 280 with child full immunization included time spent at immunization service [ $X^2(P\text{-value})$   
 281  $= 8.01(0.018)$ ] and being informed when to come for next vaccination [ $X^2(P\text{-value}) = 5.13(0.024)$ ].

282 **Table 5: Association between child immunization status and health system-related factors**

**Immunization status**

| Variables                                                          | Partially immunized<br>(n=146) | Fully immunized<br>(n=190) | Pearson Chi-square | p-value      |
|--------------------------------------------------------------------|--------------------------------|----------------------------|--------------------|--------------|
| <b>Was screamed at by health worker when late for immunization</b> |                                |                            |                    |              |
| Yes                                                                | 62 (42.5)                      | 91 (47.9)                  | 0.98               | 0.322        |
| No                                                                 | 84 (57.5)                      | 99 (52.1)                  |                    |              |
| <b>Time spent at immunization service</b>                          |                                |                            |                    |              |
| <30 minutes                                                        | 82 (56.2)                      | 115 (60.5)                 | 8.01               | <b>0.018</b> |
| 30 minutes to 1 hour                                               | 41 (28.1)                      | 63 (33.2)                  |                    |              |
| > 1 hour                                                           | 23 (15.7)                      | 12 (6.3)                   |                    |              |
| <b>Educated how to manage vaccines side effects</b>                |                                |                            |                    |              |
| Yes                                                                | 44 (30.1)                      | 44 (23.2)                  | 2.08               | 0.149        |
| No                                                                 | 102 (69.9)                     | 146 (76.8)                 |                    |              |
| <b>Being informed when to come for next vaccination</b>            |                                |                            |                    |              |
| Yes                                                                | 102 (69.9)                     | 153 (80.5)                 | 5.13               | <b>0.024</b> |
| No                                                                 | 44 (30.1)                      | 37 (19.5)                  |                    |              |

283 When multivariate analysis was performed as shown in Table 6, it was noted that there was  
 284 no association between all variables and child full immunization except place of delivery, which  
 285 showed that children whose places of delivery was the health facility, were 2.12 times more likely  
 286 to be fully immunized compared to children who were born at home [AOR (95%CI) p-  
 287 value=2.12(1.14-3.94)0.017].

288 **Table 6: Predictors of immunization status among children under five years old in Nadowli-**  
 289 **Kaleo District**

| Variables                     | Immunization status |                 | Crude Odd ratio               | Adjusted odd ratio   |
|-------------------------------|---------------------|-----------------|-------------------------------|----------------------|
|                               | Partially immunized | Fully immunized | COR(95% CI)p-value            | AOR(95%CI)p-value    |
| <b>Age (Mother/caregiver)</b> |                     |                 |                               |                      |
| ≤30                           | 77 (51.3)           | 67 (36.0)       | <b>Reference</b>              | <b>Reference</b>     |
| 31-35                         | 56 (37.3)           | 85 (45.7)       | 1.70(1.06-2.72) <b>0.027</b>  | 1.29(0.72-2.31)0.399 |
| 36 and above                  | 17 (11.3)           | 34 (18.3)       | 2.38(1.21- 4.67) <b>0.012</b> | 1.58(0.66-3.79)0.304 |
| <b>Marital status</b>         |                     |                 |                               |                      |
| Married                       | 98 (65.3)           | 149 (80.1)      | 2.29(1.40-3.75) <b>0.001</b>  | 1.33(0.72-2.45)0.356 |
| Single                        | 52 (34.7)           | 37 (19.9)       | <b>Reference</b>              | <b>Reference</b>     |
| <b>Occupation</b>             |                     |                 |                               |                      |
| Government employee           | 17 (11.3)           | 42 (22.6)       | 2.17(1.14-4.13) <b>0.019</b>  | 1.57(0.76-3.24)0.220 |
| Self employed                 | 51 (34.0)           | 49 (26.3)       | 0.77(0.47-1.27)0.308          | 0.77(0.45-1.32)0.342 |
| Unemployed                    | 82 (54.7)           | 95 (51.1)       | <b>Reference</b>              | <b>Reference</b>     |

**Birth order of current child**

|      |           |           |                              |                      |
|------|-----------|-----------|------------------------------|----------------------|
| 1st  | 74 (49.3) | 73 (39.3) | <b>Reference</b>             | <b>Reference</b>     |
| 2nd  | 43 (28.7) | 46 (24.7) | 1.10(0.65-1.87)0.713         | 0.83(0.45-1.52)0.544 |
| ≥3rd | 33 (22.0) | 67 (36.0) | 2.20(1.29-3.74) <b>0.004</b> | 1.41(0.70-2.82)0.331 |

**Number of ANC visits**

|              |           |           |                              |                      |
|--------------|-----------|-----------|------------------------------|----------------------|
| No ANC visit | 11 (7.5)  | 10 (5.2)  | <b>Reference</b>             | <b>Reference</b>     |
| ≤3 times     | 89 (61.0) | 90 (47.4) | 1.62(0.60-4.38)0.338         | 1.10(0.38-3.20)0.864 |
| 4+ times     | 46 (31.5) | 90 (47.4) | 3.11(1.13-8.55) <b>0.028</b> | 1.42(0.46-4.38)0.547 |

**Place of delivery**

|                 |            |            |                              |                              |
|-----------------|------------|------------|------------------------------|------------------------------|
| Home            | 42 (28.8)  | 24 (12.6)  | <b>Reference</b>             | <b>Reference</b>             |
| Health facility | 104 (71.2) | 166 (87.4) | 2.79(1.60-4.88) <b>0.000</b> | 2.12(1.14-3.94) <b>0.017</b> |

**Distance to health facility**

|      |            |            |                              |                      |
|------|------------|------------|------------------------------|----------------------|
| >5KM | 28 (19.2)  | 21 (11.1)  | <b>Reference</b>             | <b>Reference</b>     |
| ≤5KM | 118 (80.8) | 169 (88.9) | 1.91(1.03-3.52) <b>0.039</b> | 1.66(0.83-3.32)0.152 |

**Time spent at immunization service**

|                      |           |            |                               |                       |
|----------------------|-----------|------------|-------------------------------|-----------------------|
| <30 minutes          | 82 (56.2) | 115 (60.5) | 2.69(1.32- 6.56) <b>0.010</b> | 1.93(0.85-4.41)0.119  |
| 30 minutes to 1 hour | 41 (28.1) | 63 (33.2)  | 2.95(1.32-6.56) <b>0.008</b>  | 2.28(0.97- 5.37)0.059 |
| > 1 hour             | 23 (15.7) | 12 (6.3)   | <b>Reference</b>              | <b>Reference</b>      |

**Information on next vaccination section**

|     |            |            |                              |                      |
|-----|------------|------------|------------------------------|----------------------|
| Yes | 102 (69.9) | 153 (80.5) | 1.78(1.08-2.95) <b>0.024</b> | 1.29(0.73-2.29)0.379 |
| No  | 44 (30.1)  | 37 (19.5)  | <b>Reference</b>             | <b>Reference</b>     |

290 **Discussion**

291 Childhood immunization is crucial in stopping numerous illnesses and preventing an  
 292 estimated 2 to 3 million deaths per year globally [27]. However, despite the effectiveness of  
 293 vaccines, vaccine-preventable diseases still cause around 2.5 million childhood deaths annually,  
 294 with roughly 1.5 million of those deaths occurring in developing countries among children under  
 295 the age of 5 [28]. The main reason for conducting this study was to identify the factors that are  
 296 associated with low childhood immunization coverage among mothers or caregivers. In this study,  
 297 many factors have been found to influence childhood immunization uptake and are categorized  
 298 below.

299 This our current study has found that the majority (55.4%) of respondents in this study  
 300 were immunized fully. This present study’s coverage is lower, compared to the Ghana national

301 target for all antigens of 95% coverage [14]. This is an indication that there are still high dropout  
302 rates of some antigens and could be indicative of poor performance and low access to  
303 immunization services. This finding did not agree with a lower figure that was reported in Ethiopia  
304 which showed that 77.4% of the children were fully immunized, and 15.5% were partially  
305 immunized [6]. However, a lower proportion of the overall full immunization coverage of 38.3%  
306 was reported in another study conducted in Ethiopia [29]. A similar finding was disclosed in a  
307 cluster survey that was carried out in the Techiman Municipality. The survey indicated that 89.5%  
308 of the children had received complete vaccinations, 9.5% had received some of the required  
309 vaccinations, and 1.0% had not been vaccinated at all [30].

310         According to the current study, age, marital status, occupation of the mother or caregiver,  
311 and birth order of the child being immunized were socio-demographic elements that showed a  
312 significant association with child complete immunization in the study area. This may be because  
313 mothers aged 19 and above may have become more aware of the significance of vaccination,  
314 leading to a decrease in the number of unvaccinated children. Additionally, the detrimental effects  
315 that result from not being immunized may have contributed to this positive trend [31]. Moreover,  
316 a likely reason regarding maternal occupation would be that mothers who might be engaged in one  
317 occupation or the other would not have to depend on their partners for transportation costs to take  
318 their children for immunization. The educational level of a mother could be improved by being  
319 married, as married mothers access to education may be better than single mothers with different  
320 responsibilities and may prioritize their children's needs over their education [32]. If both partners  
321 collaborate to improve their child's health, the supportive role of the partner may also boost the  
322 mother's knowledge. This is similar to what was reported in Nigeria that maternal age, marital  
323 status, and occupation were some of the factors which all directly affected commencement,

324 continuation, and completion of immunization [33]. Another similar finding was reported in the  
325 Assin North Municipality, Ghana, that the coverage of immunization was influenced by various  
326 maternal factors, such as the age, profession, educational background, and awareness regarding  
327 immunization and diseases that can be prevented through vaccination [21]. This finding of the  
328 current study, however, contradicted with what was reported in Burkina Faso, that the status of  
329 vaccination was considerably linked with factors such as place of dwelling, year of visit, ethnic  
330 background, and level of education of the mother [20].

331         Our study found that approximately 47.4% of study participants had their children fully  
332 immunized. Attending at least one ANC had significant association with complete vaccination.  
333 The results also showed that the majority (87.4%) of those who delivered in health facilities had  
334 their children fully immunized. This suggests that educating mothers about the benefits of  
335 immunizing their children early might have resulted in this. Furthermore, mothers who attended  
336 health care facilities regularly during pregnancy may have received childhood immunization  
337 counseling, which encouraged them to accept and prioritize the importance of timely childhood  
338 immunization. This finding further indicates that place of birth has a statistically significant  
339 association with full vaccination of children, and that children born in health care facilities are 2.12  
340 times more likely to be vaccinated than those born at home. This is partly in support of the finding  
341 from a cross-sectional study reported in Kenya where the factors influencing low immunization  
342 coverage were found to be family size, place of birth, caregiver literacy, and their awareness, as  
343 well as whether you live a nomadic lifestyle [5]. A child born in a health facility is five times more  
344 likely to be vaccinated than a vaccine delivered to her home [5]. Moreover, in this present study,  
345 mothers who walked 5 kilometres or less to the nearest health facility had most of their children  
346 fully immunized (88.9%). Additionally, the distance to a health facility was significantly

347 associated with child full immunization. This could be due to the fact that mothers who may be  
348 willing to get their children immunized and may be far from the reach of any health facility during  
349 the particular period of time and may not be able to afford transportation or walk to these outreach  
350 centres for services. This finding also agreed with the report of a study in Ethiopia, that distance  
351 to a health facility, delivery place, and follow-up during ANC were found to be significantly  
352 associated with children full immunization status [6].

353 In addition, it was found in this current study that the majority (52.1%) of the mothers who  
354 were never screamed at by health worker (s) when they were late during immunization had their  
355 children fully immunized. This may enhance or encourage mothers to take their children for  
356 vaccination. This finding further explained the revelation in a descriptive cross-sectional study  
357 conducted in Kenya, that the factor that hampers the process of regular immunization was  
358 attributed to the negative attitude of certain healthcare workers [17]. However, being screamed at  
359 by a health worker was not statistically associated with child full immunization status in this study.  
360 Moreover, time spent during immunization services was found to be statistically associated (p-  
361 value= 0.018) with child full immunization with a greater proportion of 60.5% of the mothers who  
362 spent less than 30 minutes at immunization had their children fully immunized. This supported the  
363 findings reported in rural areas of Nigeria that parent objections, disagreement, or concerns about  
364 immunization safety (38.8%), long distance walking (17.5%), and long waiting time at the health  
365 facility (15.2%) were the most common reasons for partial immunization [34].

366 Moreover, although not statistically associated, a greater proportion (76.8%) of mothers  
367 who were educated on how to manage vaccine side effects had their children fully immunized.  
368 Furthermore, being informed when to come for the next vaccination was also found to be  
369 significantly associated with child full immunization with the majority (80.5%) of the mothers

370 who were informed about their next CWC visit had their children fully immunized. These findings  
371 of the present study were in consonance with what was reported in a community based cross-  
372 sectional study conducted in the slum areas of Mumbai, India, which reported that poor awareness  
373 and fear of adverse events, were some of the major reasons to not get immunized [19].

374 In conclusion, the immunization status of children in the Nadowli-Kaleo District was just  
375 a little above average (55.4%), hence, still below target. This study found that the factors which  
376 were significantly associated with child full immunization were age of mother or caregiver, marital  
377 status, occupation, and birth order of the current child. The results further showed that number of  
378 ANC visits, place of delivery, and distance to health facility were factors which had statistically  
379 significance association with child full immunization and hindered immunization. Children who  
380 were delivered in a healthcare facility had about 2.1 times greater chance of receiving full  
381 immunization as compared to those who were born in homes. The study also identified health  
382 system-related factors that had a significant correlation with complete immunization of children  
383 included time spent at the immunization service and being informed when to come for the next  
384 vaccination.

385 We therefore recommend that midwives and community health nurses should educate  
386 pregnant mothers to have skilled delivery, particularly at health facilities to ensure there is  
387 improved immunization coverage. In addition, the Nadowli-Kaleo District Health Directorate  
388 together with the Ghana Expanded Programme on immunization should conduct an immunization  
389 campaign frequently, focusing on all required vaccines and team up with sensitization of parents  
390 about the importance of completing the immunization schedule for children.

## 391 **Acknowledgement**

392            Many thanks go to the District Director of Health Services, Nadowli-Kaleo District, the In-  
393 charges of all facilities who assisted me in obtaining the data and all my study participants  
394 (mothers/caregivers) for their cooperation and willingness to take part in the study, as well as my  
395 data collection assistants for helping me administer the questionnaires successfully.



## 396           **References**

- 397    1.    Pan American Health Organization (PAHO), World Health Organization (WHO).  
398    Immunization [Internet]. 2022 [cited 2022 Nov 1]. Available from:  
399    <https://www.paho.org/en/topics/immunization#:~:text=Immunization is the process>  
400    whereby,against subsequent infection or disease.
- 401    2.    Center for Disease Control and Prevention (CDC). Understanding How Vaccines Work  
402    [Internet]. 2021 [cited 2022 Nov 1]. p. 3–5. Available from:  
403    <https://www.cdc.gov/vaccines/hcp/conversations/understanding-vacc-work.html#print>
- 404    3.    WHO. Immunization coverage cluster survey, reference manual. 2005.
- 405    4.    Rodrigues CMC, Plotkin SA, Foundation MG. Impact of Vaccines ; Health , Economic and  
406    Social Perspectives. 2020;11(July).
- 407    5.    Kiptoo E, Esilaba M, Kobia G, Ngure R. Factors Influencing Low Immunization Coverage  
408    Among Children Between 12 - 23 Months in East Pokot, Baringo Country, Kenya. *Int J*  
409    *Vaccines Vaccin.* 2015;1(2).
- 410    6.    Girmay A, Dadi AF. Full Immunization Coverage and Associated Factors among Children  
411    Aged 12-23 Months in a Hard-to-Reach Areas of Ethiopia. *Int J Pediatr* [Internet].  
412    2019;2019:1–8. Available from: <https://doi.org/10.1155/2019/1924941>
- 413    7.    WHO. Immunization coverage: Facts sheet [Internet]. 2019 [cited 2020 May 15]. Available  
414    from: <https://www.who.int/news-room/fact-sheets/detail/immunization-coverage>
- 415    8.    Bangura JB, Xiao S, Qiu D, Ouyang F, Chen L. Barriers to childhood immunization in sub-  
416    Saharan Africa: A systematic review. *BMC Public Health.* 2020;20(1).
- 417    9.    Kazungu JS, Adetifa IMO. Crude childhood vaccination coverage in West Africa: Trends  
418    and predictors of completeness [version 1; Referees: 1 approved, 3 approved with

- 419 reservations]. Wellcome Open Res. 2017;2(0):1–18.
- 420 10. Almond D, Currie J. Human Capital Development before Age Five. In: Handbook of Labor  
421 Economics. 2011. p. 1315–486.
- 422 11. Ministry of Health - Ghana. Immunization Programme Comprehensive Multi-year Plan  
423 (2010--2014) [Internet]. Accra; 2014. Available from: [http://bidinitiative.org/wp-](http://bidinitiative.org/wp-content/files_mf/1405555264GhanaComprehensivemultiyearplanfor20102014YearUnknown.pdf)  
424 [content/files\\_mf/1405555264GhanaComprehensivemultiyearplanfor20102014YearUnkno-](http://bidinitiative.org/wp-content/files_mf/1405555264GhanaComprehensivemultiyearplanfor20102014YearUnknown.pdf)  
425 [wn.pdf](http://bidinitiative.org/wp-content/files_mf/1405555264GhanaComprehensivemultiyearplanfor20102014YearUnknown.pdf)
- 426 12. Zewdie A, Letebo M, Mekonnen T. Reasons for defaulting from childhood immunization  
427 program: A qualitative study from Hadiya zone, Southern Ethiopia. BMC Public Health  
428 [Internet]. 2016;16(1):1–9. Available from: <http://dx.doi.org/10.1186/s12889-016-3904-1>
- 429 13. Konwea PE, David FA, Ogunsile SE. Determinants of compliance with child immunization  
430 among mothers of children under five years of age in Ekiti State , Nigeria. J Heal Res.  
431 2018;32(3):229–36.
- 432 14. Yawson AE, Bonsu G, Senaya LK, Yawson AO, Eleeza JB, Awoonor-Williams JK, et al.  
433 Regional disparities in immunization services in Ghana through a bottleneck analysis  
434 approach: Implications for sustaining national gains in immunization. Arch Public Heal  
435 [Internet]. 2017;75(1):1–10. Available from: <http://dx.doi.org/10.1186/s13690-017-0179-7>
- 436 15. WHO/UNICEF. Improving Routine Immunization Service Delivery to Urban Poor in  
437 Ghana : Results of Situational Analysis AREAS SAMPLED. 2017;(July).
- 438 16. DHIMS2. Pent 3 coverage. 2019.
- 439 17. Njeru SK, Kagoiyo WS, Butto D. Barriers To Uptake of Childhood Routine Immunization  
440 In Nyeri County, Kenya. IOSR J Nurs Heal Sci. 2017;6(2):79–85.
- 441 18. Noh J, Kim Y, Akram N, Yoo K, Park J, Cheon J, et al. Factors affecting complete and

- 442 timely childhood immunization coverage in Sindh , Pakistan ; A secondary analysis of  
443 cross- sectional survey data. PLoS One [Internet]. 2018;13(10):1–15. Available from:  
444 <http://dx.doi.org/10.1371/journal.pone.0206766>
- 445 19. Singh S, Sahu D, Agrawal A, Vashi MD. Barriers and opportunities for improving  
446 childhood immunization coverage in slums: A qualitative study. Prev Med Reports  
447 [Internet]. 2019;14. Available from: <https://doi.org/10.1016/j.pmedr.2019.100858>
- 448 20. Kagoné M, Yé M, Nébié E, Sie A, Schoeps A, Muller O, et al. Vaccination coverage and  
449 factors associated with adherence to the vaccination schedule in young children of a rural  
450 area in Burkina Faso. Glob Health Action [Internet]. 2017;10(1). Available from:  
451 <https://doi.org/10.1080/16549716.2017.1399749>
- 452 21. Ofosu SK. Factors Contributing To Immunisation Coverage in Assin North Municipality  
453 [Internet]. University of Ghana; 2017. Available from:  
454 [http://student.ucol.ac.nz/library/onlineresources/Documents/APA\\_Guide\\_2017.pdf](http://student.ucol.ac.nz/library/onlineresources/Documents/APA_Guide_2017.pdf)
- 455 22. Ibrahim IS. Routine Infant Immunization ; Factors Influencing Noncompliance With the  
456 Schedule in the Tamale Metropolis. University for Development Studies; 2017.
- 457 23. Tadesse T, Getachew K, Assefa T, Ababu Y, Simireta T, Birhanu Z, et al. Factors and  
458 misperceptions of routine childhood immunization service uptake in ethiopia: Findings  
459 from a nationwide qualitative study. Pan Afr Med J. 2017;28:1–9.
- 460 24. GSS. 2010 Population and housing Census:District analytical report. Accra; 2014.
- 461 25. Cochran WF. Sampling Techniques: Chapter 5. In: Sampling Techniques [Internet]. third  
462 edit. New York: John Wiley and Sons; 1977. p. 10. Available from:  
463 [https://scholar.google.com.tr/scholar?q=sampling+techniques&btnG=&hl=en&as\\_sdt=0,5](https://scholar.google.com.tr/scholar?q=sampling+techniques&btnG=&hl=en&as_sdt=0,5)  
464 #0

- 465 26. Nath DC, Patowari B. Estimation and Comparison of Immunization Coverage under  
466 Different Sampling Methods for Health Surveys. *Int J Popul Res.* 2014;2014(i):1–14.
- 467 27. United Nations Children’s Fund (UNICEF). Vaccination and Immunization Statistics -  
468 UNICEF DATA [Internet]. 2022 [cited 2023 May 4]. Available from:  
469 <https://data.unicef.org/topic/child-health/immunization/>
- 470 28. Aalemi AK, Shahpar K, Mubarak MY. Factors influencing vaccination coverage among  
471 children age 12-23 months in Afghanistan: Analysis of the 2015 Demographic and Health  
472 Survey. *PLoS One* [Internet]. 2020;15(8 August):1–16. Available from:  
473 <http://dx.doi.org/10.1371/journal.pone.0236955>
- 474 29. Tamirat KS, Sisay MM. Full immunization coverage and its associated factors among  
475 children aged 12-23 months in Ethiopia: Further analysis from the 2016 Ethiopia  
476 demographic and health survey. *BMC Public Health.* 2019;19(1):1–7.
- 477 30. Adokiya MN, Baguune B, Ndago JA. Evaluation of immunization coverage and its  
478 associated factors among children 12-23 months of age in Techiman Municipality, Ghana,  
479 2016. *Arch Public Heal.* 2017;75(1):1–10.
- 480 31. Galadima AN, Zulkefli NAM, Said SM, Ahmad N. Factors influencing childhood  
481 immunisation uptake in Africa: a systematic review. *BMC Public Health.* 2021;21(1):1–20.
- 482 32. Pepin JR, Sayer LC, Casper LM. Marital Status and Mothers’ Time Use: Childcare,  
483 Housework, Leisure, and Sleep. *Demography.* 2018;55(1):107–133.
- 484 33. Oleribe O, Kumar V, Awosika-Olumo A, Taylor-Robinson SD. Individual and  
485 socioeconomic factors associated with childhood immunization coverage in Nigeria. *Pan  
486 Afr Med J.* 2017;26:1–14.
- 487 34. Abdulraheem I s, Onajole AT, Jimoh AAG, Oladipo AR. Reasons for incomplete

488 vaccination and factors for missed opportunities among rural Nigerian children. J Public  
489 Heal Epidemiol [Internet]. 2011;3(April):194–203. Available from:  
490 [http://www.academicjournals.org/article/article1379427155\\_Abdulraheem et al.pdf](http://www.academicjournals.org/article/article1379427155_Abdulraheem%20et%20al.pdf)

491

492 **Supporting information**

493 S1 Fig 1: Immunization status of children

494 S2 Cleaned Data used for analysis

495 S3 Stata Dofile for Data used for analysis

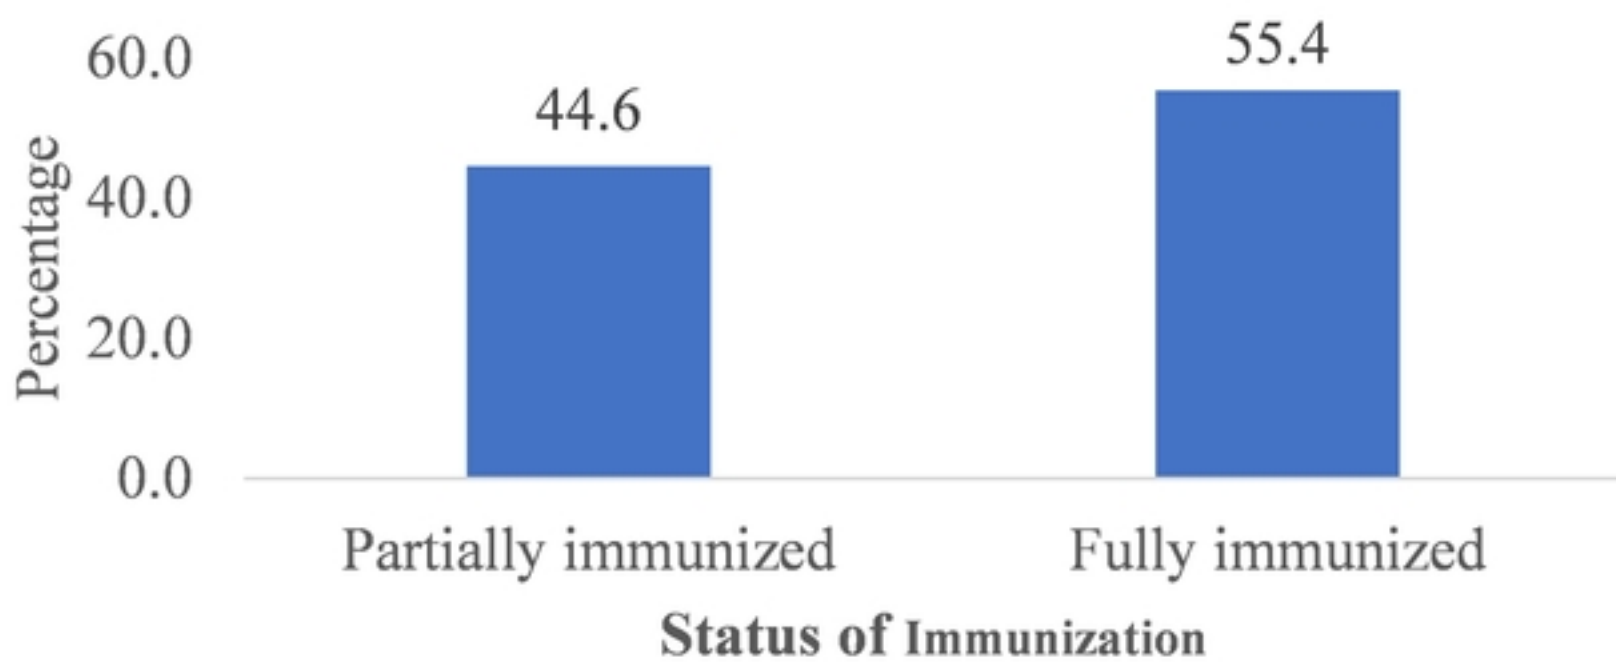

**Fig 1: Immunization status of children**

Figure
